# Supplementary material
Source: MDPI journal article supplement (https://www.mdpi.com/2079-6412/13/10/1726)

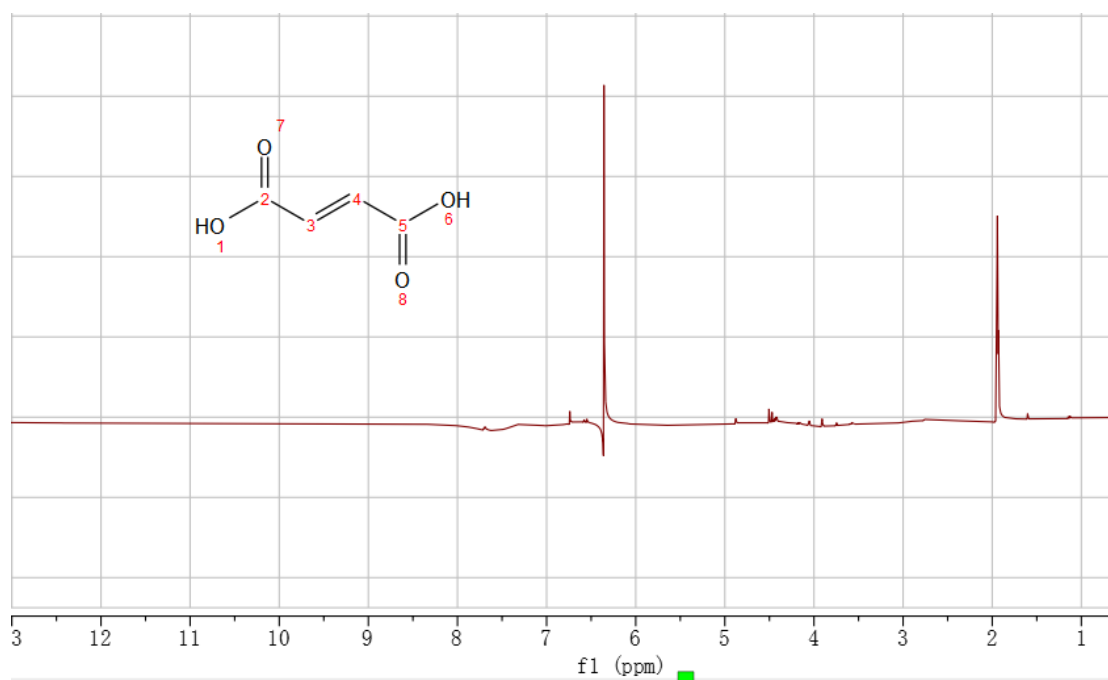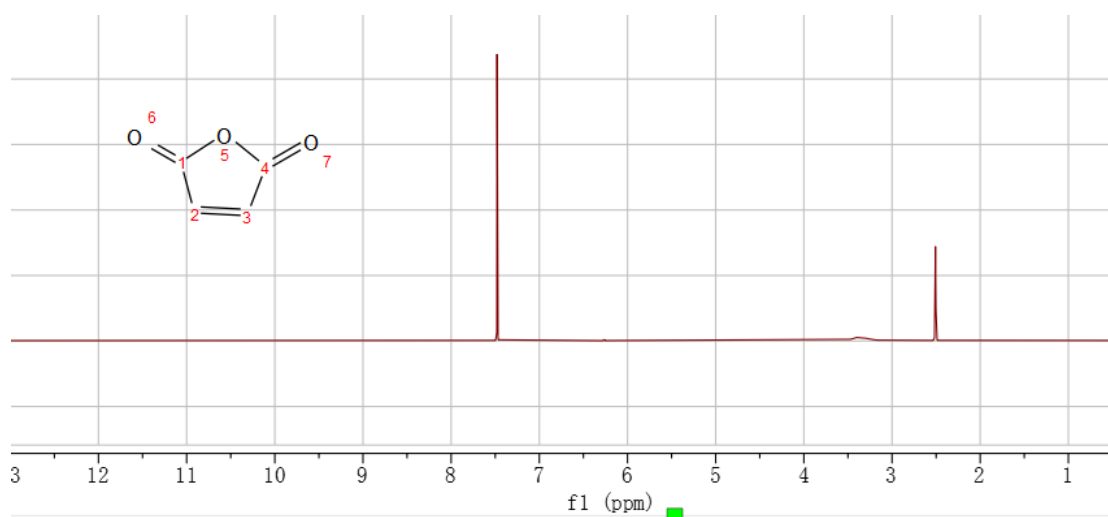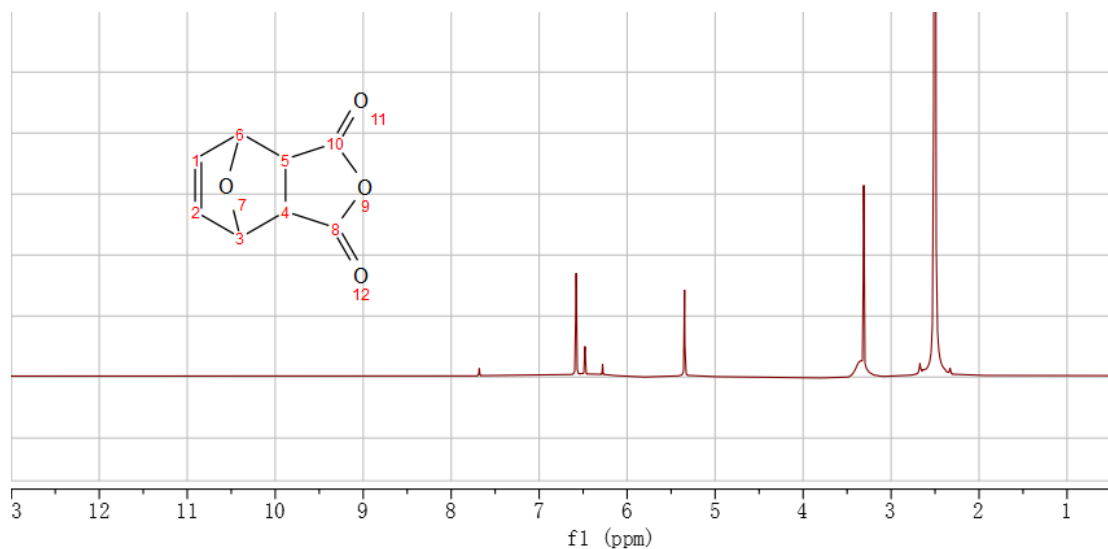

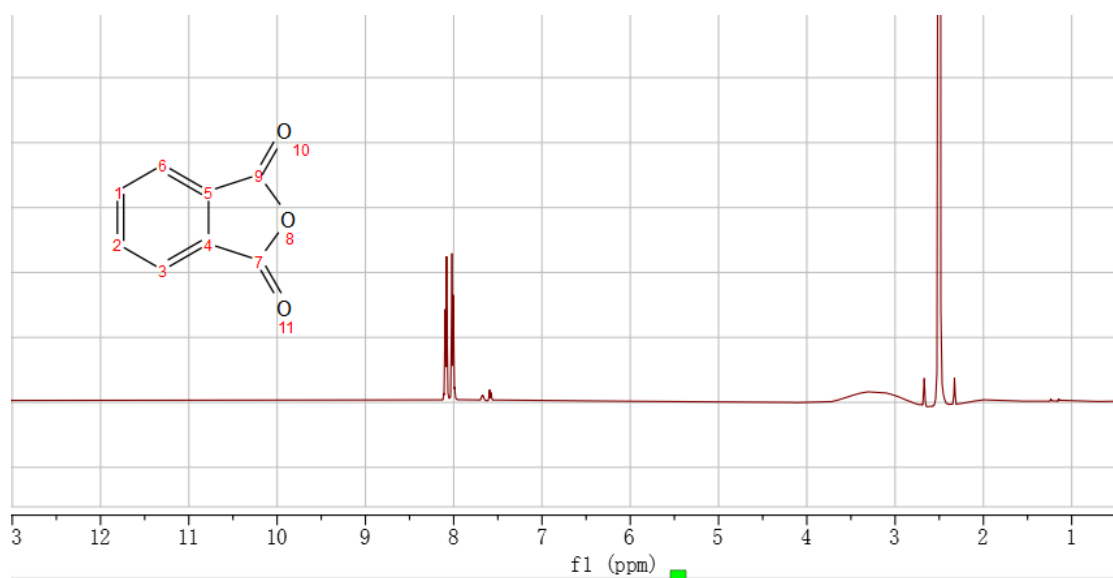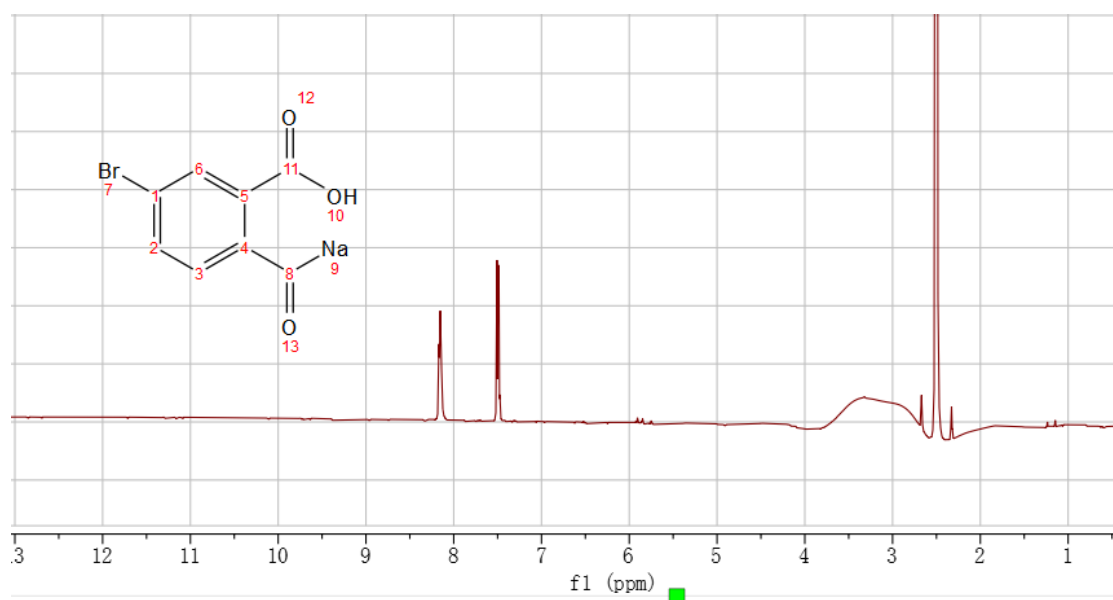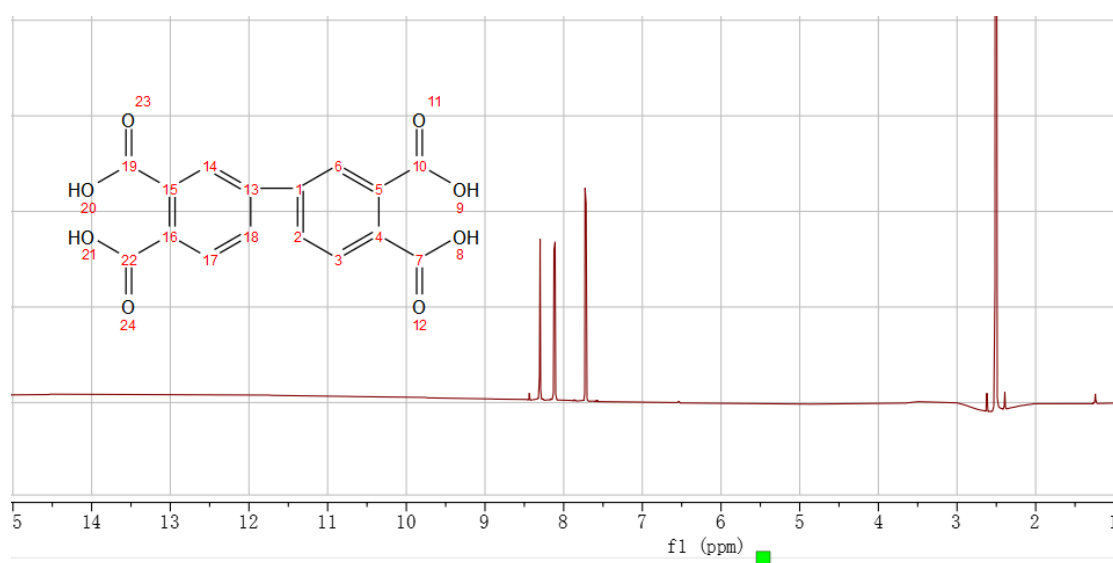

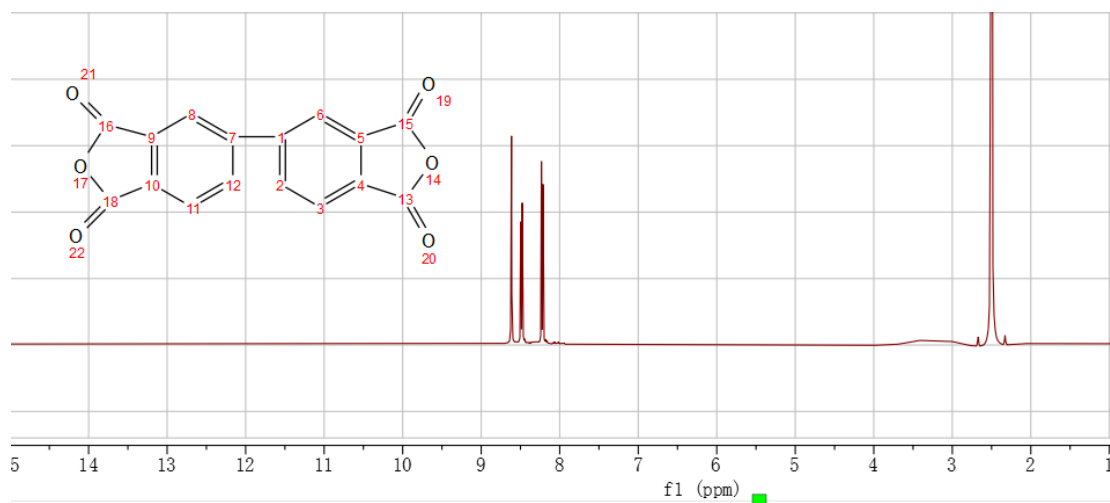

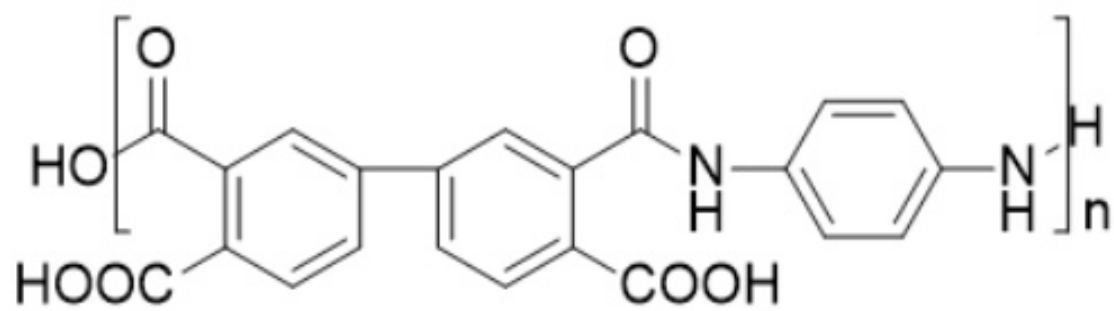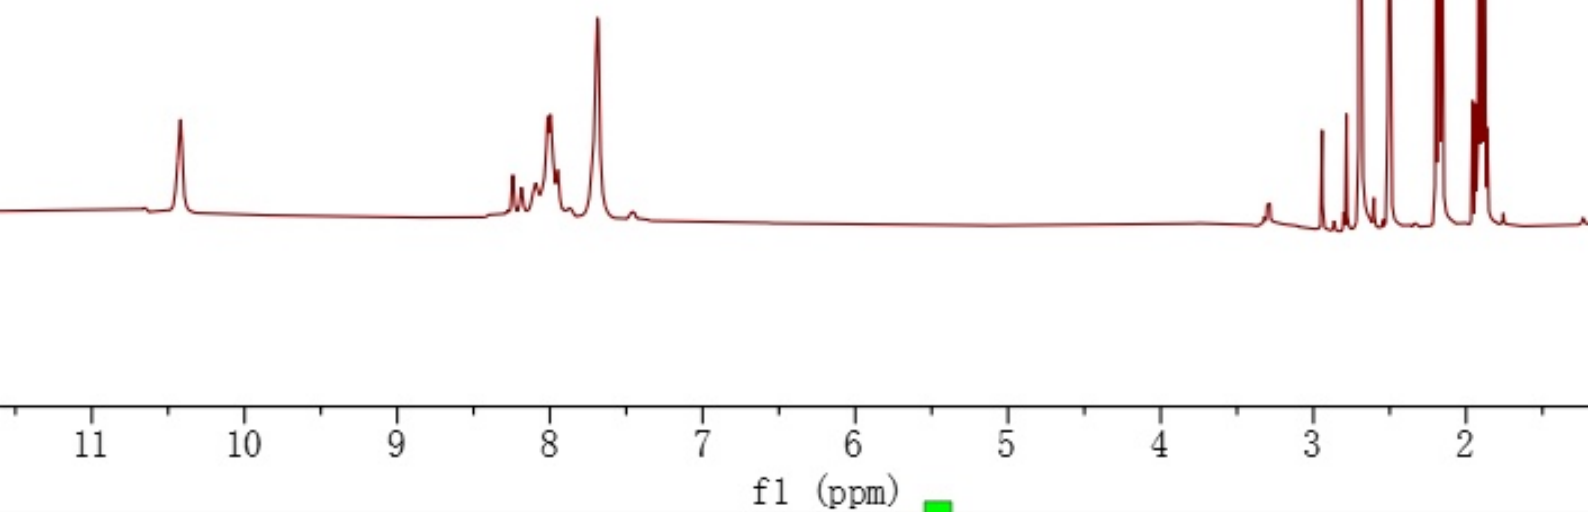

Supplement: s1 [file s1]
